# Supplementary material
Source: Springer Nature journal article supplement (https://www.springermedizin.de/resource/supplementary/13012_2012_563_MOESM3_ESM.pdf/9630030)
Supplement: MOESM3 [file 9630030]

**Additional file 1 - Dissemination and Implementation (D&I) Measures on GEM Wiki Platform and affiliated analytics (data as of 5/14/2012)**

| <b>Construct</b>  | <b>Measures of Construct</b>                                                | <b># of Hits</b> | <b># Visitors</b> | <b># of editing hits</b> | <b># of Comments</b> | <b># of Downloads</b> |
|-------------------|-----------------------------------------------------------------------------|------------------|-------------------|--------------------------|----------------------|-----------------------|
| Acceptability     |                                                                             | 144              | 109               | 8                        | 1                    | N/A                   |
|                   | Van Schaik's Technology acceptance                                          | 37               | 23                | 15                       | --                   | 5                     |
|                   | Evidence Based Practice Attitude scale                                      | 116              | 78                | 24                       | --                   | 17                    |
|                   | Suicide Prevention Program Rating Profile                                   | 11               | 6                 | 7                        | --                   | --                    |
|                   | Therapists' attitudes toward treatment manuals                              | 27               | 18                | 12                       | --                   | 3                     |
|                   | Treatment Evaluation Inventory                                              | 70               | 51                | 22                       | --                   | 5                     |
|                   | Residents incorporation of EBM in practice                                  | 19               | 14                | 10                       | --                   | 2                     |
|                   | Atkinson's Perceived Attributes of eHealth Innovations                      | 91               | 51                | 19                       | 1                    | 14                    |
| Adherence         |                                                                             | 233              | 115               | 99                       | --                   | N/A                   |
|                   | Questionnaire on the Quality of Physician-Patient Interaction               | 23               | 18                | 9                        | --                   | --                    |
|                   | Medical Outcomes Study (MOS) Measures of Adherence                          | 24               | 16                | 5                        | --                   | --                    |
|                   | Morisky 8-Item Medication Adherence Scale                                   | 545              | 372               | 41                       | --                   | 128                   |
|                   | Morisky 4-Item Self-Report Measure of Medication-Taking Behavior (MMAS-4)   | 355              | 199               | 44                       | --                   | 96                    |
| Adopter Attitudes |                                                                             | 14               | 12                | 1                        | --                   | N/A                   |
|                   | Steckler's Perception of Innovation "Roger's Adoption Questionnaire         | 39               | 24                | 17                       | --                   | 3                     |
| Adoption          |                                                                             | 58               | 36                | 92                       | --                   | N/A                   |
|                   | Roman's measure of adoption in substance abuse treatment                    | 17               | 11                | 11                       | --                   | 1                     |
|                   | Haug's Measure of Evidence-Based Practice Adoption                          | 33               | 27                | 10                       | --                   | --                    |
|                   | Nursing Practice Questionnaire                                              | 11               | 9                 | 7                        | --                   | --                    |
|                   | Li, Simon, Bodenheimer, Gillies, Casalino, Schmittiel, & Shortell, adoption | 19               | 12                | 8                        | --                   | 1                     |

|                                |                                                                                         |    |    |    |    |     |
|--------------------------------|-----------------------------------------------------------------------------------------|----|----|----|----|-----|
|                                | Menachemi, Saunders, Chukmaitov, Matthews, & Brooks                                     | 16 | 11 | 10 | -- | 1   |
|                                | Noonan, Emshoff, Mooss, Armstrong, Weinberg, & Ball, Adoption, Adaptation, and Fidelity | 22 | 12 | 11 | -- | 2   |
|                                | Zaidi, Marriott, & Nation, adoption, acceptability and appropriateness                  | 56 | 20 | 16 | -- | --  |
|                                | RE-AIM Adoption measure                                                                 | 70 | 42 | 27 | -- | 9   |
| Advancing Women Scientists     |                                                                                         | 3  | 3  | 20 | -- | N/A |
|                                | ADVANCE Scale                                                                           | 36 | 18 | 20 | -- | --  |
| Appropriateness                |                                                                                         | 41 | 25 | 39 | -- | N/A |
|                                | Nancy Atkinson scale of perceived attributes of eHealth innovations                     | 24 | 17 | 9  | -- | 1   |
|                                | Workshop Evaluation                                                                     | 29 | 19 | 10 | -- | 6   |
|                                | Zaidi's survey of web-based antibiotic approval systems                                 | 12 | 7  | 5  | -- | 1   |
|                                | Pankratz perceived attributes of a federal drug prevention policy scale                 | 13 | 9  | 10 | -- | 1   |
|                                | Cognitive behavior and Monitoring Scale                                                 | 15 | 10 | 5  | -- | 2   |
| Care Coordination              |                                                                                         | 73 | 61 | 19 | 1  | N/A |
|                                | Care Transitions Measure                                                                | 79 | 61 | 12 | -- | --  |
|                                | Usual Provider Continuity Index                                                         | 33 | 24 | 52 | 1  | --  |
|                                | Continuity of Care Index                                                                | 27 | 19 | 30 | -- | --  |
|                                | Perception of Continuity (PC) Scale                                                     | 41 | 32 | 38 | -- | --  |
| Chronic Illness Care           |                                                                                         | 35 | 35 | 5  | -- | N/A |
|                                | Patient Assessment of Chronic Illness Care (PACIC)                                      | 51 | 33 | 12 | -- | 3   |
| Collaborative Service Delivery |                                                                                         | 10 | 10 | 6  | -- | N/A |
|                                | Assessing Readiness for Collaborative Service Delivery                                  | 36 | 23 | 6  | -- | --  |
| Comorbidity                    |                                                                                         | 24 | 19 | 3  | -- | N/A |
|                                | Questionnaire to Verify Stroke Free Status                                              | 8  | 5  | 18 | -- | --  |
| Continuous Quality Improvement |                                                                                         | 18 | 15 | 3  | -- | N/A |
|                                | Organizational-Level Processes of Change Scale                                          | 35 | 27 | 10 | -- | --  |

|                                    |                                                                |     |    |    |    |     |
|------------------------------------|----------------------------------------------------------------|-----|----|----|----|-----|
| Cost                               |                                                                | 18  | 14 | 21 | -- | N/A |
|                                    | Recruitment Costs                                              | 13  | 12 | 3  | -- | --  |
|                                    | Intervention Costs                                             | 21  | 14 | 6  | -- | --  |
|                                    | Implementation Costs                                           | 41  | 32 | 5  | -- | --  |
|                                    | Cost-effectiveness Ratio                                       | 38  | 31 | 7  | -- | --  |
| Demographics                       |                                                                | 31  | 21 | 7  | -- | --  |
| Diffusion                          |                                                                | 22  | 18 | 9  | -- | --  |
| Dissemination                      |                                                                | 40  | 32 | 18 | -- | --  |
| Evidence-based Quality Improvement |                                                                | 3   | 3  | 2  | -- | N/A |
|                                    | ACE EBP Readiness Inventory                                    | 27  | 19 | 40 | -- | --  |
| Feasibility                        |                                                                | 32  | 23 | 4  | -- | N/A |
|                                    | Vandelanotte & De Bourdeaudhuij, Feasibility & Acceptability   | 37  | 29 | 10 | -- | 4   |
|                                    | Nemeroff, Feasibility                                          | 19  | 16 | 9  | -- | 1   |
|                                    | Martens, Feasibility & Acceptability                           | 21  | 17 | 6  | -- | 2   |
|                                    | Ondersma, Chase, Svikis, Schuster, Feasibility & Acceptability | 32  | 26 | 10 | -- | 1   |
| Fidelity                           |                                                                | 18  | 18 | -- | -- | --  |
|                                    | TMACT - Tool for Measurement of Assertive Community Treatment  | --  | -- | -- | -- | --  |
| Health Disparities                 |                                                                | 26  | 15 | 9  | -- | N/A |
|                                    | Index of Disparity by Percy and Keppel                         | 57  | 24 | 48 | -- | --  |
|                                    | Range Ratio                                                    | 43  | 14 | 82 | -- | --  |
|                                    | Range Difference                                               | 40  | 10 | 71 | -- | --  |
|                                    | Theil Index                                                    | 40  | 16 | 50 | -- | --  |
|                                    | Absolute Concentration Index                                   | 102 | 38 | 79 | -- | --  |
|                                    | Mean Log Deviation                                             | 31  | 11 | 42 | -- | --  |
|                                    | Between-Group Variance                                         | 33  | 11 | 46 | -- | --  |

|                                                           |                                                                               |     |    |    |    |     |
|-----------------------------------------------------------|-------------------------------------------------------------------------------|-----|----|----|----|-----|
|                                                           | Health Disparities Calculator                                                 | 21  | 14 | 34 | -- | --  |
| Health Literacy/Numeracy                                  |                                                                               | 43  | 33 | 4  | -- | N/A |
|                                                           | Health Literacy Assessment Using Talking Touchscreen Technology (Health LiTT) | 30  | 13 | 4  | -- | --  |
|                                                           | Health Literacy Skills Instrument                                             | 30  | 20 | 4  | -- | --  |
|                                                           | Health Literacy Screening Questions                                           | 36  | 22 | 5  | -- | 9   |
|                                                           | Patient Literacy Preferences                                                  | 16  | 11 | 5  | -- | 3   |
|                                                           | Health Literacy Skills Instrument Short Form                                  | 27  | 20 | 7  | -- | --  |
|                                                           | Subjective Health Literacy and Numeracy                                       | 24  | 15 | 5  | -- | 7   |
| Illness Representations                                   |                                                                               | 9   | 8  | 35 | 1  | N/A |
|                                                           | Beliefs About Medicines Questionnaire                                         | 103 | 78 | 35 | 1  | --  |
| Implementation                                            |                                                                               | 48  | 39 | 10 | 1  | N/A |
|                                                           | Stages of Implementation Completion measure                                   | 74  | 45 | 51 | -- | 5   |
|                                                           | Promoting Action on Research Implementation in Health Services (PARiHS)       | 51  | 32 | 15 | -- | --  |
|                                                           | PPC-RS                                                                        | 8   | 6  | 49 | -- | --  |
|                                                           | RE-AIM Implementation measure                                                 | 42  | 29 | 16 | -- | --  |
| Implementation Climate                                    |                                                                               | 25  | 17 | 12 | -- | --  |
| Maintenance                                               |                                                                               | 8   | 7  | 11 | -- | N/A |
|                                                           | RE-AIM Maintenance Measure                                                    | 20  | 11 | 11 | -- | 6   |
| 'Middle managers' commitment to innovation implementation |                                                                               | 11  | 9  | 6  | -- | --  |
| Organizational and Group Communication                    |                                                                               | 14  | 13 | 4  | -- | N/A |
|                                                           | Group Development Questionnaire                                               | 17  | 8  | 14 | -- | --  |
| Organizational Capacity                                   |                                                                               | 33  | 27 | 63 | -- | N/A |
|                                                           | Is Research Working for You?                                                  | 30  | 22 | 3  | -- | --  |
|                                                           | McKinsey Capacity Assessment Grid                                             | 52  | 24 | 60 | -- | 5   |

|                                     |                                                                                   |    |    |    |    |     |
|-------------------------------------|-----------------------------------------------------------------------------------|----|----|----|----|-----|
| Organizational Change               |                                                                                   | 26 | 19 | 11 | -- | N/A |
|                                     | NCDDR's Dissemination Self-Inventory                                              | 6  | 5  | 39 | -- | --  |
| Organizational Climate              |                                                                                   | 41 | 26 | 14 | -- | N/A |
|                                     | Glisson's Organizational Social Context (OSC)                                     | 58 | 43 | 3  | -- | --  |
|                                     | Steckler's Organizational Climate                                                 | 25 | 16 | 17 | -- | --  |
| Organizational Culture              |                                                                                   | 63 | 40 | 23 | -- | N/A |
|                                     | Practice Culture Questionnaire                                                    | 35 | 26 | 2  | -- | --  |
|                                     | MacKenzie's Culture Questionnaire                                                 | 22 | 19 | 2  | -- | --  |
|                                     | Core Employee Questionnaire                                                       | 21 | 15 | 2  | -- | --  |
|                                     | Competing Values Framework                                                        | 44 | 30 | 2  | -- | --  |
|                                     | Quality Improvement Implementation Survey                                         | 21 | 16 | 6  | -- | 1   |
|                                     | Organizational Culture Inventory                                                  | 38 | 29 | 52 | -- | --  |
|                                     | Harrison's Organizational Ideology Questionnaire                                  | 47 | 38 | 5  | -- | --  |
|                                     | Hospital Culture Questionnaire                                                    | 10 | 7  | 12 | -- | --  |
|                                     | Nursing Unit Cultural Assessment Tool                                             | 7  | 6  | 2  | -- | --  |
|                                     | Survey of Organizational Culture                                                  | 24 | 20 | 3  | -- | --  |
|                                     | Corporate Culture Questionnaire                                                   | 22 | 13 | 3  | -- | --  |
|                                     | Hofstede's Organizational Culture Questionnaire                                   | 47 | 42 | 8  | -- | --  |
|                                     | Organizational Culture Survey                                                     | 29 | 23 | 12 | -- | --  |
| Organizational Readiness for Change |                                                                                   | 33 | 27 | 2  | -- | N/A |
|                                     | Organizational Readiness-to-Change Assessment (ORCA)                              | 61 | 41 | 39 | -- | 7   |
|                                     | CPCQ (Change Process Capability Questionnaire)                                    | 17 | 13 | 46 | -- | --  |
| Partnership                         |                                                                                   | 12 | 10 | 10 | -- | N/A |
|                                     | PARTNER (Program to Analyze, Record, and Track Networks to Enhance Relationships) | 13 | 9  | 30 | -- | --  |
|                                     | Partnership Self-Assessment Tool                                                  | 9  | 8  | 25 | -- | --  |
|                                     | Human Services integration measure                                                | 8  | 7  | 20 | -- | --  |
|                                     | Review Criteria and Rating Scale for Community-Based                              | 8  | 6  | 21 | -- | 1   |

|                                        |                                                                   |     |    |    |    |     |
|----------------------------------------|-------------------------------------------------------------------|-----|----|----|----|-----|
|                                        | Participatory Research                                            |     |    |    |    |     |
| Patient Goals                          |                                                                   | 39  | 28 | 4  | -- | N/A |
|                                        | Open Ended Goal Setting Tool                                      | 40  | 21 | 9  | -- | 10  |
|                                        | Patient's Preferred Method for Communication                      | 23  | 16 | 9  | -- | 1   |
|                                        | Goal Evaluation Tool (GET)                                        | 37  | 22 | 8  | -- | 9   |
| Patient Satisfaction with Decision Aid |                                                                   | 27  | 22 | 33 | 1  | N/A |
|                                        | Acceptability of Decision Aid Scale                               | 120 | 76 | 33 | 1  | --  |
| Penetration                            |                                                                   | 13  | 11 | 4  | -- | N/A |
|                                        | Langabeer's Questionnaire                                         | 11  | 7  | 2  | -- | --  |
|                                        | Woltmann's Index of Penetration                                   | 12  | 9  | 2  | -- | --  |
|                                        | Shediac-Rizkallah's Measure of Penetration                        | 7   | 5  | 2  | -- | --  |
|                                        | Bartholomeu Workshop Evaluation and Workshop Assessment Follow-Up | 11  | 9  | 7  | -- | --  |
|                                        | Stile's Measure of Penetration                                    | 6   | 5  | 2  | -- | --  |
| Perceived Autonomy Support             |                                                                   | 5   | 5  | 16 | 1  | N/A |
|                                        | Perceived Autonomy Support                                        | 43  | 27 | 16 | 1  | 4   |
| Perceived Competence Scale             |                                                                   | 20  | 19 | 18 | -- | N/A |
|                                        | Perceived Competence Scale                                        | 82  | 48 | 18 | -- | 16  |
| Pragmatism                             |                                                                   | 2   | 2  | 4  | -- | N/A |
|                                        | PRECIS (Pragmatic-Exploratory Continuum Indicator Summary)        | 10  | 6  | 40 | -- | --  |
| Quality of Life                        |                                                                   | 73  | 61 | 11 | 1  | N/A |
|                                        | Veterans RAND 12 Item Health Survey (VR-12)                       | 33  | 28 | 8  | -- | --  |
|                                        | EQ-5D                                                             | 15  | 10 | 3  | -- | 5   |
|                                        | Behavioral Risk Factor Surveillance System- Quality of Life       | 21  | 14 | 5  | -- | 5   |
|                                        | SF-12                                                             | 10  | 8  | 6  | -- | --  |
|                                        | PROMIS Global Physical Health (GPH) Short Survey                  | 34  | 18 | 22 | 1  | 6   |
| Reach                                  |                                                                   | 6   | 5  | 4  | -- | N/A |

|                                                                                                                                                                                  |                                                         |    |    |    |    |     |
|----------------------------------------------------------------------------------------------------------------------------------------------------------------------------------|---------------------------------------------------------|----|----|----|----|-----|
|                                                                                                                                                                                  | RE-AIM Reach Measure                                    | 26 | 16 | 11 | -- | 3   |
| Research Utilization                                                                                                                                                             |                                                         | 15 | 11 | 53 | -- | N/A |
|                                                                                                                                                                                  | Level of Research Utilization in Policy-Making          | 27 | 17 | 12 | -- | 4   |
|                                                                                                                                                                                  | Hall's Levels of Use Scale                              | 34 | 23 | 13 | -- | 2   |
|                                                                                                                                                                                  | Landry's Use of Social Science Research                 | 40 | 15 | 20 | -- | --  |
|                                                                                                                                                                                  | Landry's Knowledge Utilization Scale among Policymakers | 27 | 12 | 11 | -- | 4   |
| Social Support                                                                                                                                                                   |                                                         | 32 | 30 | 4  | -- | N/A |
|                                                                                                                                                                                  | The Social Support Questionnaire                        | 37 | 28 | 5  | -- | --  |
|                                                                                                                                                                                  | Chronic Illness Resources Survey (CIRS)                 | 34 | 21 | 7  | -- | 10  |
|                                                                                                                                                                                  | ENRICHD Social Support Inventory (ESSI)                 | 34 | 27 | 11 | -- | --  |
|                                                                                                                                                                                  | Medical Outcomes Study-Social Support Survey            | 11 | 8  | 4  | -- | --  |
|                                                                                                                                                                                  | Wisconsin Social Support Scale                          | 22 | 20 | 6  | -- | --  |
| Sustainability                                                                                                                                                                   |                                                         | 22 | 16 | 1  | 2  | N/A |
|                                                                                                                                                                                  | Program Sustainability Assessment Tool                  | 30 | 25 | 6  | -- | --  |
|                                                                                                                                                                                  | Goodman's Level of Institutionalization                 | 56 | 28 | 20 | 2  | 4   |
| Treatment Self-Regulation                                                                                                                                                        |                                                         | 18 | 14 | 25 | -- | N/A |
|                                                                                                                                                                                  | Treatment Self-Regulation Questionnaire                 | 35 | 20 | 25 | -- | 5   |
| Adapted from <a href="https://www.gem-beta.org/public/wsmeasures.aspx?cat=8&amp;aid=1&amp;wid=11">https://www.gem-beta.org/public/wsmeasures.aspx?cat=8&amp;aid=1&amp;wid=11</a> |                                                         |    |    |    |    |     |
